# Supplementary material for: Interactions between Dpr11 and DIP-γ control selection of amacrine neurons in Drosophila color vision circuits
Source: eLife. 2019 Nov 6;8:e48935. doi: 10.7554/eLife.48935 (PMC6879306; doi:10.7554/eLife.48935)
Supplement: Figure 3—source data 1. — Column two indicates the identities of the input synapses from R7 onto each Dm8. The reconstructed volume is unlikely to cover the entire arbor of these Dm8 neurons, since each Dm8 can contact 12–16 R7 (Gao et al., 2008). However, column two shows that within the reconstructed columns there is no apparent specificity in synaptic connectivity between y and p R7 and Dm8 neurons outside of their home columns. For example, pDm8-B/home receives synapses from four non-home column R7, at least 2 of which are yR7, while yDm8-A receives synapses from two non-home column pR7 and a yR7. Even the Dm8 at the center of the reconstruction (Dm8-B/home) only receives synapses from four non-home column R7 PRs, so many Dm8 contacts with R7 columns may not be associated with input synapses from R7. The total number of non-home column R7 PRs that synapse onto the Dm8 is indicated in the parentheses in column 2. Synapses labeled as ? in column two are from R7 PRs in columns that cannot be assigned as y or p. Also note that (Karuppudurai et al., 2014) found that Tm5a dendrites specifically associate with yR7 axons, but they stated that Tm5b dendrites have no specificity for association with y vs. p R7 axons. Our analysis of the EM reconstruction, however, shows that all 3 pR7 PRs synapse only onto Tm5b and not Tm5a. The conclusion of Karuppudurai et al. (2014) likely arises from the fact that Tm5b usually has two distal dendritic projections. One of these always arborizes with a pR7 axon and receives the pR7 input. The other one can arborize with either a y or a p R7, but does not receive yR7 input, at least not for this set of columns. Four of the 7 Dm8, and 3 of the 8 R7 PRs, also have synapses onto Tm5c neurons. There is no specificity for y vs. p in the connections to Tm5c. Both R7 classes have input and output synapses with Dm9, and both classes of Dm8 have output synapses onto Dm9. [file elife-48935-fig3-data1.xlsx]

## Sheet: Sheet1
neuron	input synapses from R7s onto Dm8s	pDm8-B/home	pDm8-D	yDm8-A	yDm8-E	yDm8-F	yDm8-J	yDm8-K	Tm5b-home	Tm5b-B	Tm5b-D	Tm5a-A	Tm5a-E	Tm5a-F	Tm5a-J	Tm5a-K	Dm9s	Tm5cs
pDm8-B/home	27, 24 home cols.; 9p, 7y, 7? non-home (4 other R7s)								4:0, M5	30:0, M5					2:0, M6		28:0, M5	1:0, M6
pR7-B		24:2, M5		4:0, M6						14:0, M5							18:46, M5
pR7-home		27:0, M5	6:0, M6	2:0, M6		8:0, M6			8:0, M5	7:0, M5							17:55, M5	2:0, M5/6
pDm8-D	30 home col.; 7p, 0y, 9? non-home (3 other R7s)										16:0, M6						6:0, M6	2:0, M6
pR7-D		9:0, M6	30:0, M6								17:0, M6						12:34, M5
yDm8-A	47 home col.; 6p, 1y non-home (3 other R7s)								10:0, M6			5:2, M5					7:0, M5, M6
yR7-A		3:0, M5		47:0, M5								10:0, M5					11:29, M5
yDm8-E	50 home col.; 0 non-home								9:0, M6				13:0, M6	0:7, M6			18:0, M5	4:0, M5/6
yR7-E					50:0, M5	3:0, M6							19:0, M5				19:37, M5	1:0, M4
yDm8-F	25 home col.; 9p, 4y, 7? non-home (5 other R7s)										2:0, M6			15:0, M5			18:0, M5	1:0, M6
yR7-F		4:0, M5				25:0, M5								16:0, M5			29:32, M5	2:0, M5
yDm8-J	18 home col.; 3y, 6? non-home (2 other R7s)								8:0, M6						10:2, M6	4:1, M6
yR7-J							18:0, M6								13:0, M6
yDm8-K	27 home col.; 0 non-home															10:0, M6	8:0, M6
yR7-K							3:0, M6	27:1, M6								21:0, M6	19:11, M5
