# Supplementary material for: Interactions between Dpr11 and DIP-γ control selection of amacrine neurons in Drosophila color vision circuits
Source: eLife. 2019 Nov 6;8:e48935. doi: 10.7554/eLife.48935 (PMC6879306; doi:10.7554/eLife.48935)
Supplement: Figure 5—source data 1. — The percentage of two-home column yDm8 clones in DIP-γ -/- mutants is 4.5-fold higher than in wild-type. Quantitation of flipout clones in wild-type, DIP-γ and dpr11 mutants shown. Flipouts were generated with either pan-Dm8 driver R24F06-Gal4 or the yDm8 split-Gal4 driver R24F06-p65.AD; DIP-γ Gal4-DBD. Complete genotypes in Table 3 of Materials and methods. [file elife-48935-fig5-data1.xlsx]

## Sheet: Sheet1
			yDm8	yDm8
		Pan-Dm8	split Gal4	split Gal4	Pan-Dm8
		driver	driver	driver	driver
		WT	WT	DIPg-ko	Dpr11-ko
	Total# of clones	72	64	39	44
	Total # yDm8	51	64	39	27
	1 home column yDm8	49	60	28	25
	2 home collumn yDm8	2	4	11	2
	Total # pDm8	21	-	-	17
	1 home column yDm8	20	-	-	16
	2 home collumn yDm8	1	-	-	1
